# Supplementary material
Source: PubMed Central journal article supplement (PMC3419855)
Supplement: Supp_Fig1.pdf [file Supp_Fig1.pdf]

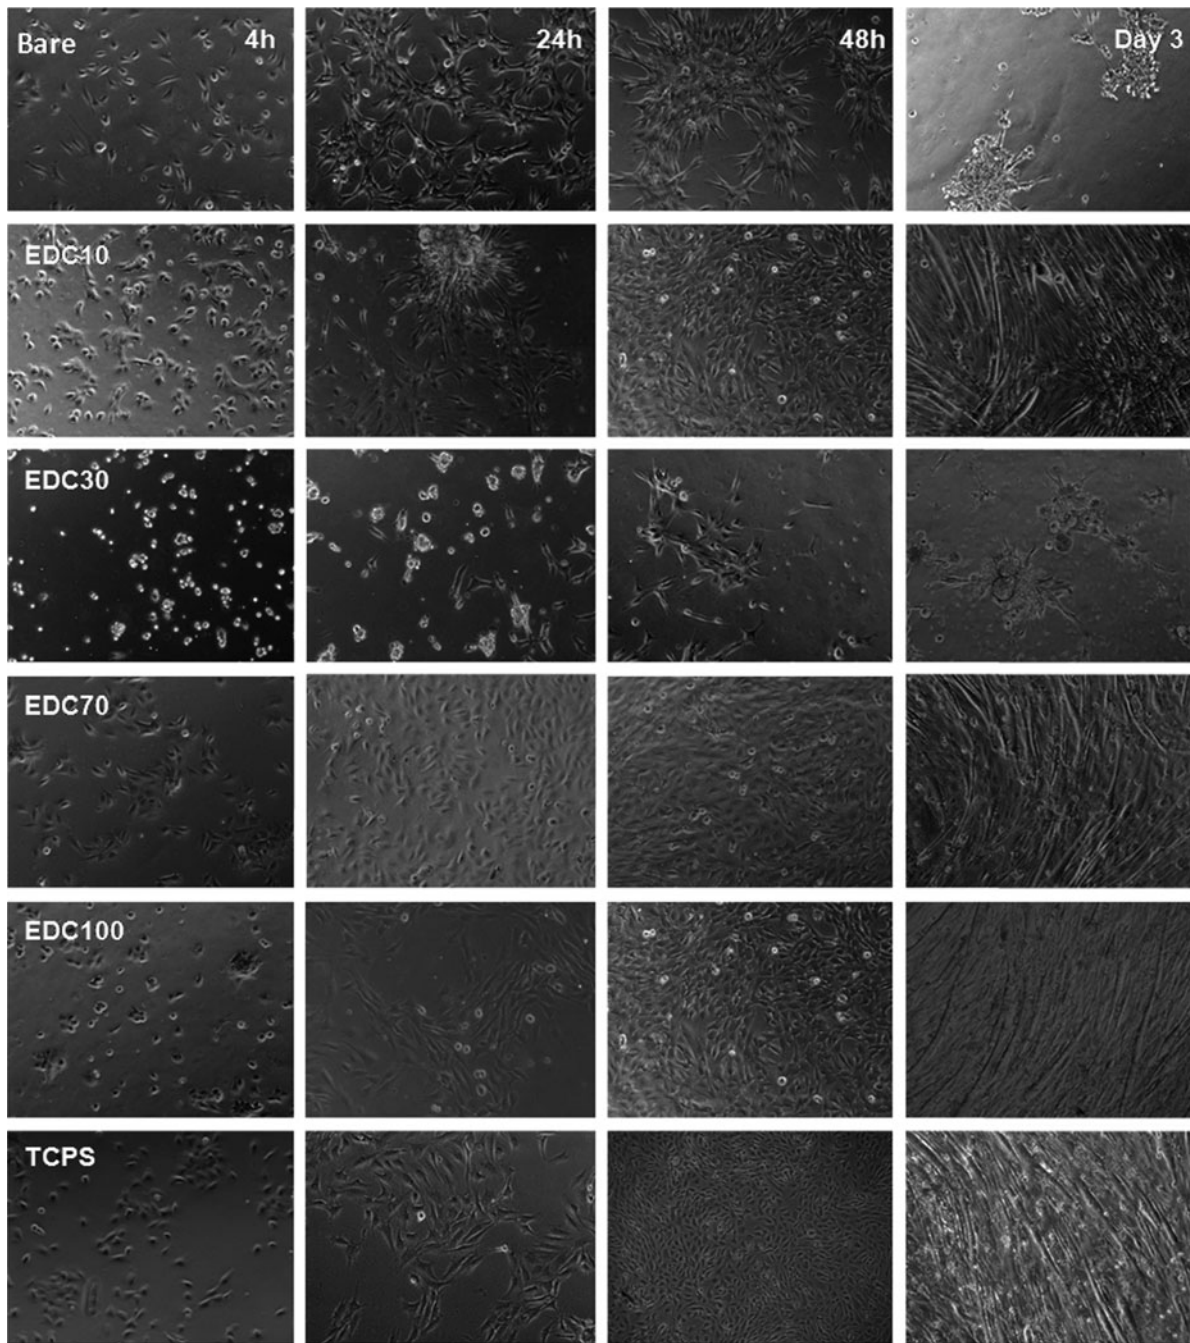

**SUPPLEMENTARY FIG. S1.** C2C12 adhesion (4 h), proliferation (24 and 48 h), and differentiation (3 days in differentiation medium, D3) on various polyelectrolyte multilayer cross-linked films, on tissue culture polystyrene, and on bare polydimethylsiloxane.
