# Supplementary material
Source: PubMed Central journal article supplement (PMC3419855)
Supplement: Supp_Fig2.pdf [file Supp_Fig2.pdf]

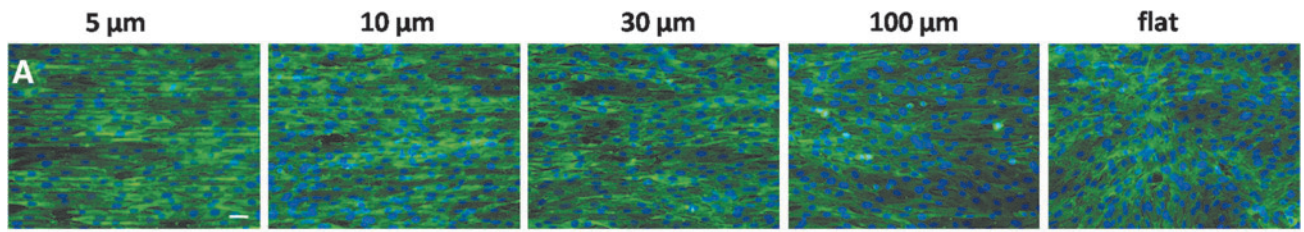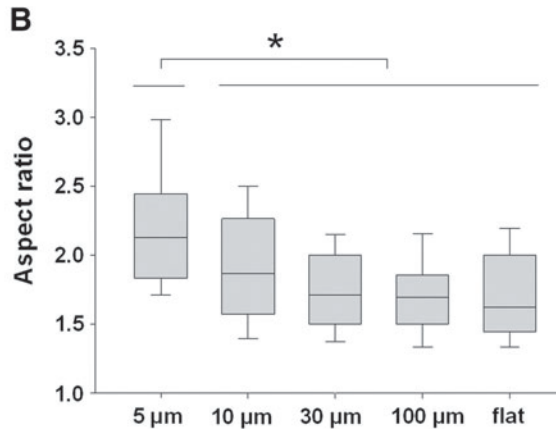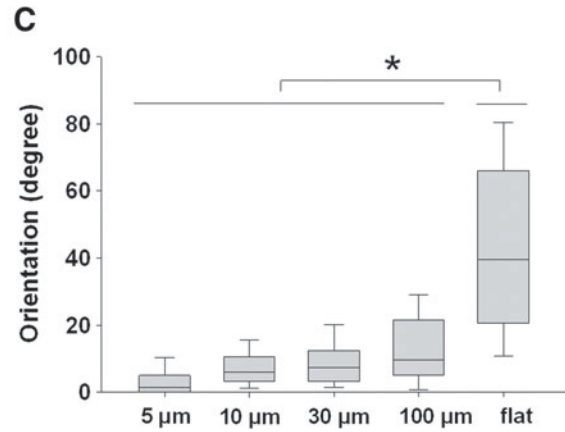

**SUPPLEMENTARY FIG. S2.** Late orientation of myoblasts after 48 h of culture in growth medium on the micropatterns. (A) Nuclei staining (Hoechst) and vinculin immunostaining, scale bar 20 μm (B) Aspect ratio of nuclei according to the pattern size. (C) Orientation of nuclei. Statistical analyses were performed by All Pairwise Multiple-Comparison Procedures (Dunn's Method), \* $p < 0.05$ .
